# Supplementary material for: The Australian clinical trial landscape: Perceptions of rural, regional and remote health service capacity and capability
Source: PubMed Central journal article supplement (PMC11657177; doi:10.1186/s12961-024-01270-z), 2024-12-19
Supplement: 12961_2024_1270_MOESM1_ESM.pdf [file 12961_2024_1270_MOESM1_ESM.pdf]

The Australian clinical trial landscape: Perceptions of rural, regional, and remote health service capacity and capability

Title: **Additional File 1** – Interview Guides

Description: This file contains the interview guides that were used to conduct the semi-structured interviews. The first guide was used to interview clinician researchers and industry stakeholders. The second guide was used to interview health service stakeholders.

| <b>Interview Guide – Clinician Researcher and Industry Stakeholders</b> |                                                                                                                                                                                                                                                                                                                                                                                                                                                                                                                                                                                                                                                                 |
|-------------------------------------------------------------------------|-----------------------------------------------------------------------------------------------------------------------------------------------------------------------------------------------------------------------------------------------------------------------------------------------------------------------------------------------------------------------------------------------------------------------------------------------------------------------------------------------------------------------------------------------------------------------------------------------------------------------------------------------------------------|
| <b>Landscape &amp; Background</b>                                       | <p><b>1. What is your current role in clinical trials?</b></p> <p><b>2. Can you tell me about the clinical trials you have been involved in up to this point?</b><br/>Prompts:</p> <ul style="list-style-type: none"> <li>○ What type of clinical trials are they?</li> <li>○ Are/have they been multi-centred?</li> <li>○ Where are/have your sites been located?</li> </ul> <p><b>3. Do you have any knowledge about the Australasian Teletrial Model?</b></p>                                                                                                                                                                                                |
| <b>Education &amp; Training</b>                                         | <p><b>4. Do you feel researchers, clinicians and research staff generally are adequately trained and experienced to carry out clinical trials?</b><br/>Prompts:</p> <ul style="list-style-type: none"> <li>○ If not, where/why do you feel the knowledge or training is lacking?</li> </ul> <p><b>5. In your opinion, what training should clinical trial researchers, clinicians and research staff have?</b><br/>Prompts:</p> <ul style="list-style-type: none"> <li>○ How can they access this training?</li> <li>○ What would help staff access this training?</li> <li>○ What clinical trial training does your institutions/workplace provide?</li> </ul> |
| <b>Workforce</b>                                                        | <p><b>6. What is your opinion on the current workforce in clinical trials in terms of demand, employment conditions and career opportunities?</b></p> <p><b>7. What is your opinion on how to attract, support and retain clinical trial workforce in the clinical trial sector?</b><br/>Prompts:</p> <ul style="list-style-type: none"> <li>○ What are the challenges to doing this? attracting/supporting/retaining</li> <li>○ How do the challenges you discussed apply in the RRR setting do you think?</li> </ul>                                                                                                                                          |
| <b>Equipment</b>                                                        | <p><b>8. Do you require specialised equipment to conduct your clinical trials? If so, what are they and how is this equipment usually arranged and funded?</b><br/>Prompts:</p> <ul style="list-style-type: none"> <li>○ Do you usually arrange the use as in-kind, a part of standard care or are they costed?</li> <li>○ How would this impact your decision to run clinical trials in RRR regions?</li> </ul>                                                                                                                                                                                                                                                |
| <b>Site Recruitment</b>                                                 | <p><b>9. In your opinion, what makes a clinical trial site successful?</b></p> <p><b>10. What is involved in selecting and setting up a clinical trial site?</b><br/>Prompts:</p> <ul style="list-style-type: none"> <li>○ Who decides what sites will be selected and how it this decision made?</li> <li>○ What are the main challenges to adding/setting up sites and retaining them? And what would make this process easier?</li> <li>○ How would these challenges be different for sites in RRR regions?</li> </ul>                                                                                                                                       |
| <b>Participant Recruitment</b>                                          | <p><b>11. In your opinion, what drives participant recruitment?</b><br/>Prompts:</p> <ul style="list-style-type: none"> <li>○ What are the challenges to enrolling participants?</li> <li>○ What helps participants stay in a clinical trial, and not drop out?</li> <li>○ How is taking part in a clinical trial different for someone living in a RRR area?</li> </ul>                                                                                                                                                                                                                                                                                        |
| <b>Policy &amp; Process</b>                                             | <p><b>12. What approvals do you require before starting one of your clinical trials?</b><br/>Prompts:</p> <ul style="list-style-type: none"> <li>○ Have you found obtaining any of these approvals challenging? If so, please explain the challenge.</li> <li>○ What could make this process easier for you?</li> </ul> <p><b>13. Can you tell me what reporting you are required to do while carrying out a clinical trial?</b><br/>Prompts:</p> <ul style="list-style-type: none"> <li>○ Have you found any reporting requirements or reporting process challenging?</li> <li>○ What could make this process easier for you?</li> </ul>                       |
| <b>Teletrial Model</b>                                                  | <p><b>14. How do you feel about clinical trials being run in a decentralized way using the Australasian Teletrial Model?</b><br/>Prompts:</p> <ul style="list-style-type: none"> <li>○ How will this change the clinical trial landscape?</li> <li>○ What do you think will be the challenges to adopting this model?</li> <li>○ What new opportunities will this model bring do you feel?</li> </ul>                                                                                                                                                                                                                                                           |

|                |                                                                                                                         |
|----------------|-------------------------------------------------------------------------------------------------------------------------|
| <b>Closing</b> | <b>That is the end of the consultation questions. Do you have anything else to add that we did not discuss earlier?</b> |
|----------------|-------------------------------------------------------------------------------------------------------------------------|

| <b>Interview Guide – Health Service Stakeholders</b> |                                                                                                                                                                                                                                                                                                                                                                                                                                                                                                                                                                                                                                                                                   |
|------------------------------------------------------|-----------------------------------------------------------------------------------------------------------------------------------------------------------------------------------------------------------------------------------------------------------------------------------------------------------------------------------------------------------------------------------------------------------------------------------------------------------------------------------------------------------------------------------------------------------------------------------------------------------------------------------------------------------------------------------|
| <b>Landscape &amp; Background</b>                    | <ol style="list-style-type: none"> <li>1. <b>Can you tell me what your role/involvement is currently in clinical trials?</b></li> <li>2. <b>Can you tell me about what your experience has been like in clinical trials up to this point?</b></li> <li>3. <b>Do you have any knowledge about the Australasian Teletrial Model?</b></li> </ol>                                                                                                                                                                                                                                                                                                                                     |
| <b>Education &amp; Training</b>                      | <ol style="list-style-type: none"> <li>4. <b>Do you feel researchers, clinicians and research staff generally are adequately trained and experienced to carry out clinical trials?</b><br/>Prompts: <ul style="list-style-type: none"> <li>○ If not, where/why do you feel the knowledge or training is lacking?</li> </ul> </li> <li>5. <b>Does your institution provide or support clinical trial training to staff?</b><br/>Prompts: <ul style="list-style-type: none"> <li>○ If so, what type of training is provided and how?</li> <li>○ If not, what type of training would be useful?</li> </ul> </li> </ol>                                                               |
| <b>Workforce</b>                                     | <ol style="list-style-type: none"> <li>6. <b>What is your opinion on the current workforce in clinical trials in terms of demand, employment conditions and career opportunities?</b></li> <li>7. <b>What is your opinion on how to attract, support and retain clinical trial workforce in the clinical trial sector?</b><br/>Prompts: <ul style="list-style-type: none"> <li>○ What are the challenges to doing this? attracting/supporting/retaining</li> <li>○ How do the challenges you discussed apply in the RRR setting do you think?</li> </ul> </li> </ol>                                                                                                              |
| <b>Equipment</b>                                     | <ol style="list-style-type: none"> <li>8. <b>What are your observations on how well clinical trials use existing equipment and infrastructure within the health departments/hospitals.</b><br/>Prompts: <ul style="list-style-type: none"> <li>○ Is use of equipment and resources for clinical trials generally welcomed and shared? And who decides? Please explain drawing from experience if possible.</li> <li>○ What factors impact whether or not equipment can be used in a clinical trial?</li> </ul> </li> </ol>                                                                                                                                                        |
| <b>Site Recruitment</b>                              | <ol style="list-style-type: none"> <li>9. <b>What are the factors are important for sites to consider when approached to take part in a clinical trial?</b><br/>Prompts: <ul style="list-style-type: none"> <li>○ During site assessment and selection process, what factors determine the speed at which this is done? For example, what factors speed up and slow down this process?</li> <li>○ What are the main issues, repeated issues, or sticking points to site selection and set up?</li> <li>○ What would make this process easier? For example, what support or changes are needed?</li> </ul> </li> </ol>                                                             |
| <b>Participant Recruitment</b>                       | <ol style="list-style-type: none"> <li>10. <b>Can you tell me how your institution performs in relation to recruiting trial participants? Do your studies consistently meet recruitment targets?</b><br/>Prompts: <ul style="list-style-type: none"> <li>○ What factors (positive and negative) impact participant recruitment?</li> <li>○ What factors impact a participant staying in a clinical trial until the end?</li> </ul> </li> </ol>                                                                                                                                                                                                                                    |
| <b>Policy &amp; Process</b>                          | <ol style="list-style-type: none"> <li>11. <b>Can you tell me what your experience has been like navigating the clinical trial approval, contractual and reporting process with industry or investigator lead researchers?</b><br/>Prompts: <ul style="list-style-type: none"> <li>○ What is the average approval time from submission to approval?</li> <li>○ What are the main reasons for longer approval times?</li> <li>○ What could help shorten the approval time?</li> <li>○ What are common, repeated or sticking points along the regulatory pathway that you find many applicants get held up?</li> <li>○ What can be done to make this easier?</li> </ul> </li> </ol> |
| <b>Teletrial Model</b>                               | <ol style="list-style-type: none"> <li>12. <b>How do you feel about clinical trials being run in a decentralized way using the Australasian Teletrial Model?</b><br/>Prompts: <ul style="list-style-type: none"> <li>○ How will this change the clinical trial landscape?</li> <li>○ What do you think will be the challenges to adopting this model?</li> <li>○ What new opportunities will this model bring do you feel?</li> </ul> </li> </ol>                                                                                                                                                                                                                                 |
| <b>Closing</b>                                       | <b>That is the end of the consultation questions. Do you have anything else to add that we did not discuss earlier?</b>                                                                                                                                                                                                                                                                                                                                                                                                                                                                                                                                                           |
